# Supplementary material for: Effectiveness of community-based support for pregnant women living with HIV: a cohort study in South Africa
Source: PubMed Central journal article supplement — AIDS Care. 2016 Feb 28;28(sup1):114–8. doi: 10.1080/09540121.2016.1148112 (PMC4828595; doi:10.1080/09540121.2016.1148112), 2016-02-28
Supplement: caic_a_1148112_sm9158.pdf [file caic_a_1148112_sm9158.pdf]

## **Summary of antiretroviral treatment initiation criteria for pregnant women and prevention of mother to-child transmission of HIV regimens**

Prior to April 2010, HIV-positive pregnant women with CD4 cell counts  $\leq 200$  cells/ $\mu$ L or World Health Organization (WHO) clinical stage IV were eligible to start lifelong triple ART. Women eligible for ART were referred to a dedicated ART clinic within the same facility. Pregnant women ineligible for ART were to receive antenatal zidovudine (ZDV) from 28 weeks gestation and intrapartum single dose nevirapine (sdNVP).<sup>1</sup> From April 2010, ART eligibility criteria for pregnant women were expanded to include women with CD4 cell counts  $\leq 350$  cells/ $\mu$ L or WHO clinical stages III or IV. Women ineligible for ART were to receive antenatal ZDV from 14 weeks gestation and intrapartum sdNVP.<sup>2</sup>

### **References:**

1. South African National Department of Health. (2008). Policy and guidelines for the implementation of the PMTCT programme. Pretoria, South Africa.
2. South African National Department of Health. (2010). Clinical guidelines: prevention of mother-to-child transmission. Pretoria, South Africa.

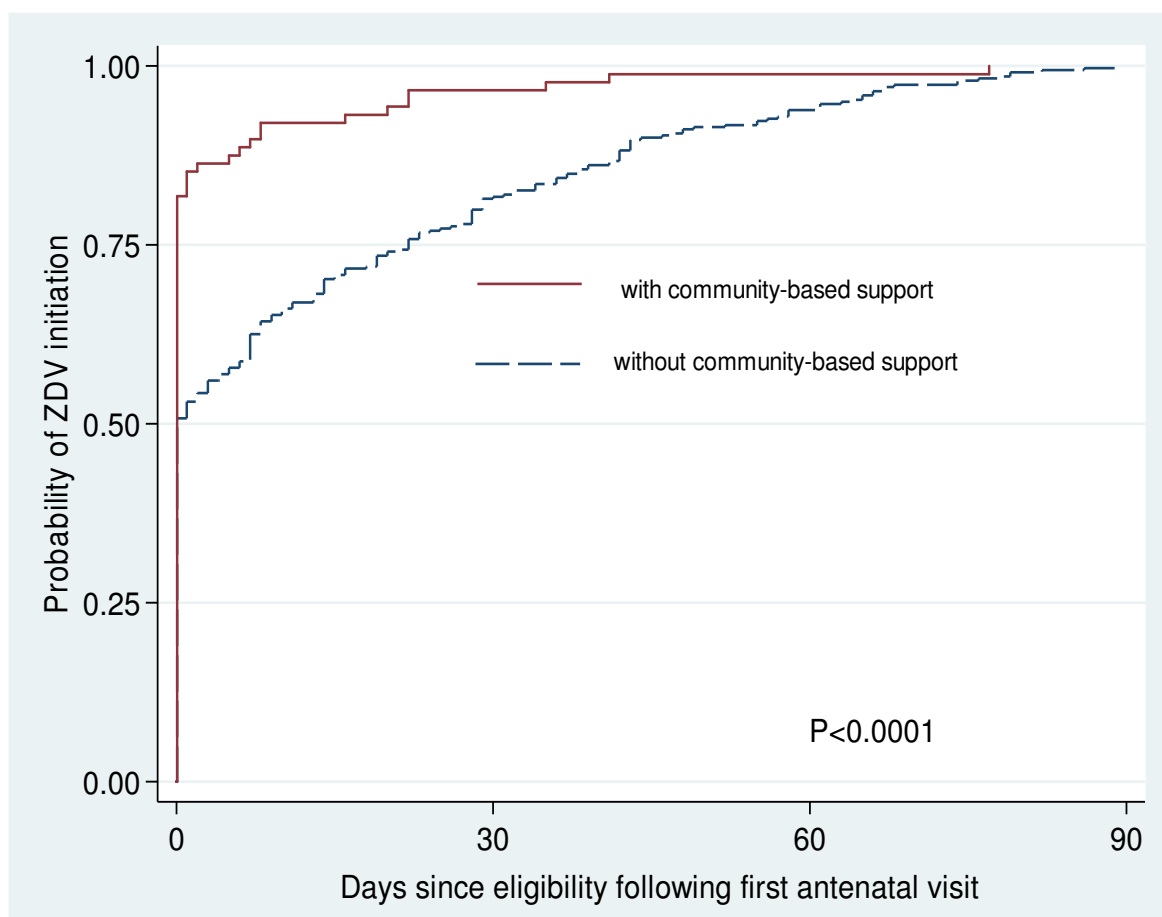

**Kaplan-Meier estimates of time till initiation of antenatal zidovudine (ZDV) since eligibility (following first antenatal visit) amongst pregnant women initiating ZDV in South Africa.**

**Antenatal characteristics of HIV-positive pregnant women who received and did not receive community-based support (CBS) in South Africa**

|                                                                                                   | <b>Received CBS</b> | <b>Did not receive CBS</b> | <b>P-value</b> |
|---------------------------------------------------------------------------------------------------|---------------------|----------------------------|----------------|
| <b>Age at first antenatal visit, median, years (IQR)</b><br>(n=1105)                              | 28.2 (23.3-32.7)    | 27.4 (23.8-32.1)           | 0.77           |
| <b>Adolescents (aged &lt;20 years), n (%)</b><br>(n=1105)                                         | 19 (7.2%)           | 57 (6.8%)                  | 0.96           |
| <b>Known HIV positive at first antenatal visit, n (%)</b><br>(n=1105)                             | 135 (51.1%)         | 430 (51.1%)                | 0.99           |
| <b>Recorded CD4 cell count result, n (%)</b><br>(n=1105)                                          | 263 (99.6%)         | 806 (95.8%)                | 0.003          |
| <b>CD4 cell count at first antenatal visit, cells/<math>\mu</math>L, median (IQR)</b><br>(n=1069) | 305 (206-480)       | 361(237-503)               | 0.010          |
| <b>CD4 cell count &lt; 200 cells/<math>\mu</math>L, n (%)</b>                                     | 61 (23.2%)          | 147 (18.2%)                | 0.078          |
| <b>Year of first antenatal visit, n (row %)</b>                                                   |                     |                            | <0.001         |
| <b>2009-2010</b>                                                                                  | 305 (90.8%)         | 31 (9.1%)                  |                |
| <b>2011-2012</b>                                                                                  | 533 (69.6%)         | 233 (30.4%)                |                |
| (n=1105)                                                                                          |                     |                            |                |
| <b>Gestational age at first antenatal visit, median, weeks, (IQR)</b><br>(n=861)                  | 22 (16-26)          | 22 (17-26)                 | 0.96           |

|                                                   |             |             |         |
|---------------------------------------------------|-------------|-------------|---------|
| <b>Feeding choice elected by pregnant women</b>   |             |             | 0.035   |
| <b>breastfeeding</b>                              | 133 (64.3%) | 448 (56.1%) |         |
| <b>formula feeding</b>                            | 74 (38.8%)  | 350 (43.9%) |         |
| (n=1005)                                          |             |             |         |
| <b>Initiation of antenatal retrovirals, n (%)</b> |             |             | <0.0001 |
| <b>on lifelong ART at first antenatal visit</b>   | 65 (24.6%)  | 122 (14.5%) |         |
| <b>initiated triple ART antenatally</b>           | 106 (40.2%) | 202 (24.0%) |         |
| <b>initiated antenatal ZDV</b>                    | 87 (33.0%)  | 393 (46.7%) |         |
| <b>received sdNVP in labour only</b>              | 2 (0.8%)    | 25 (3.0%)   |         |
| <b>nil</b>                                        | 4 (1.5%)    | 99 (11.8%)  |         |

ART-antiretroviral treatment; ZDV-zidovudine; sdNVP-single dose nevirapine; IQR-interquartile range
